# Supplementary material
Source: PubMed Central journal article supplement (PMC4907119)
Supplement: JB.00198-16_zjb999094094so10.pdf [file JB.00198-16_zjb999094094so10.pdf]

1 **SUPPLEMENTARY INFORMATION**

2 **SUPPLEMENTARY FIGURE LEGENDS**

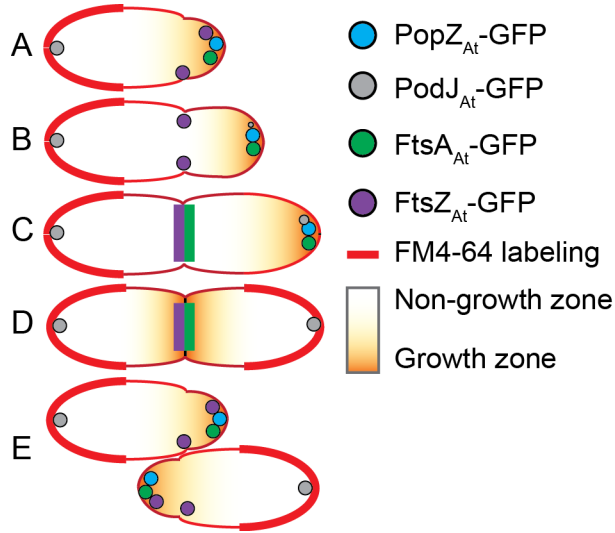

3

4 **Supplementary Figure 1. Localization of cell division proteins, polar marker proteins, and**  
5 **membrane staining patterns in WT *A. tumefaciens*.** A) newborn cell, B-C) elongating cell, D)  
6 dividing cell, and E) newborn sibling cell stages of the cell cycle. FM4-64 labeling patterns are  
7 shown, with thicker red lines indicating areas of increased fluorescence intensity (1).

8

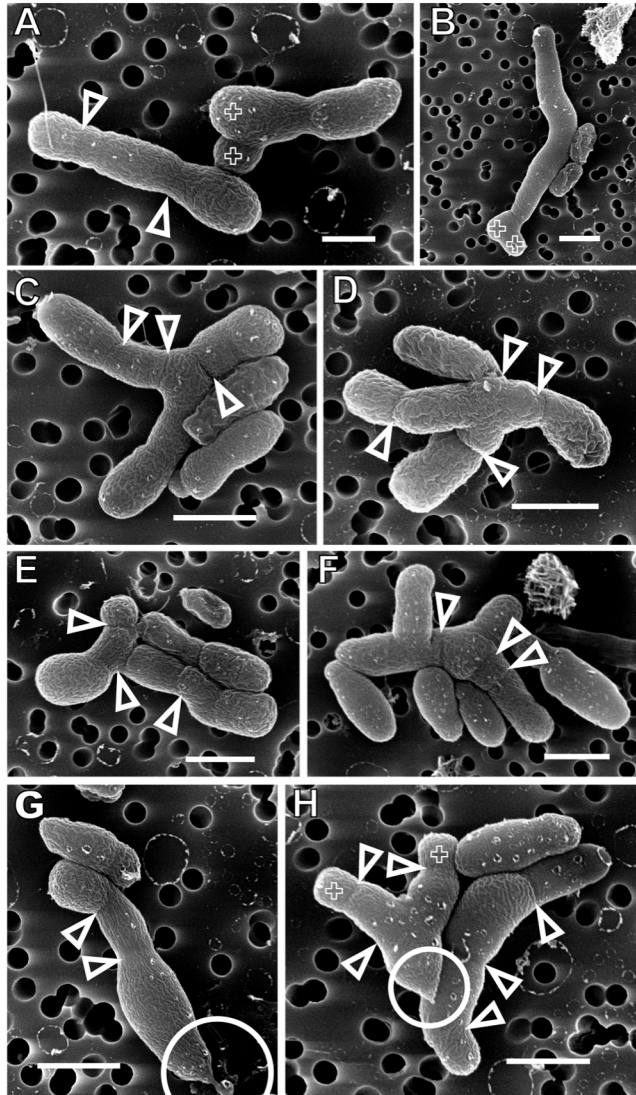

9

10 **Supplementary Figure 2. Gallery of scanning electron microscope images of  $\Delta podJ_{At}$  cells.** A) and B)  
 11 show elongated cells with branches and constrictions. C)-F) show branched cells with multiple  
 12 constrictions. G) and H) show cells with tapered poles, branches, and multiple constrictions. Arrowheads  
 13 denote constrictions, + signs denote branch tips, and circles denote tapered poles. Scale bars, 3  $\mu\text{m}$ .

14

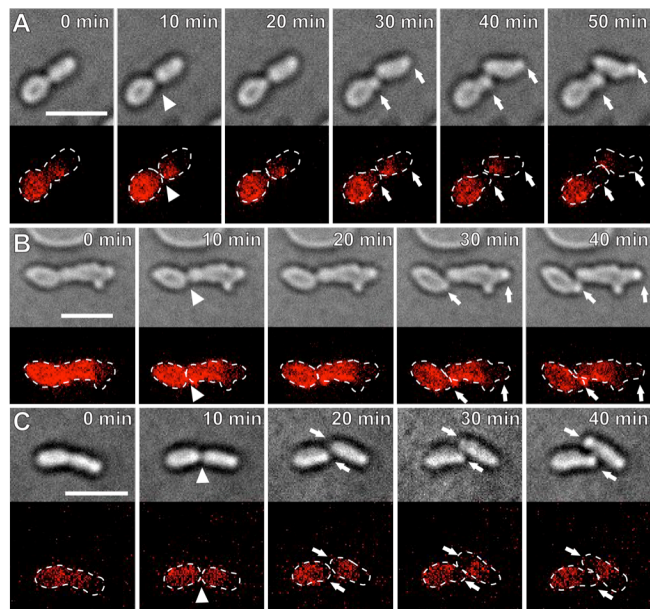

15

16 **Supplementary Figure 3. Pulse-chase labeling indicates growth abnormalities and that growing poles**

17 **are smaller in diameter than non-growing poles in  $\Delta podJ_{At}$ .** Live-cell imaging of  $\Delta podJ_{At}$  cells pulse-chase

18 labeled with TRSE. Unlabeled areas indicate sites of new cell growth during chase period. A) After

19 division (white arrowhead) the cell on the right continues to grow from the growth pole (white arrow).

20 B) After division (white arrowhead), the cell on the right continues to grow from the growth pole (white

21 arrow) and develops a branch morphology via ectopic polar growth. C) A WT cell undergoing normal

22 polar growth (white arrows) from poles derived from a division event (white arrowhead). Top:

23 brightfield images. Bottom: red fluorescence images. Scale bar, 3  $\mu\text{m}$ .

24

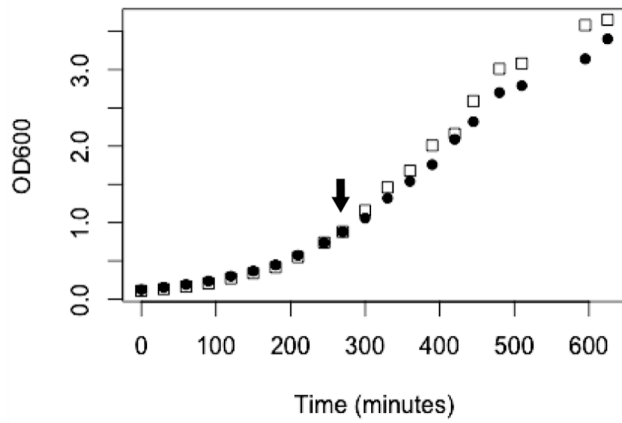

25

26 **Supplementary Figure 4. Growth of  $\Delta podJ_{At}$  cells is similar to wild type.** OD600 growth curve for C58

27 (□) and  $\Delta podJ_{At}$  (•). Arrow indicates time when CFU/mL were determined (see text).

28

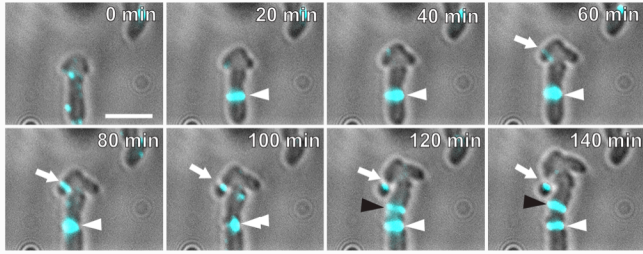

29

30 **Supplementary Figure 5. FtsZ-GFP localizes in multiple rings in  $\Delta podJ_{\Delta E}$ .** FtsZ-GFP (cyan)  
31 localizes in multiple “Z-rings” (white arrowhead, black arrowhead). FtsZ-GFP also localizes to an  
32 ectopic division site producing a small spherical cell (white arrow).

33

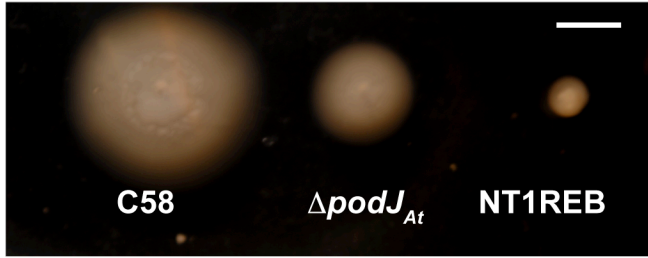

34

35 **Supplementary Figure 6. Motility of  $\Delta podJ_{At}$  is intermediate between WT and flagella minus strains.**

36 Soft agar motility assay of  $\Delta podJ_{At}$ , WT, and NT1REB (bald/flagella minus strain). Scale bar, 0.5 cm.

37

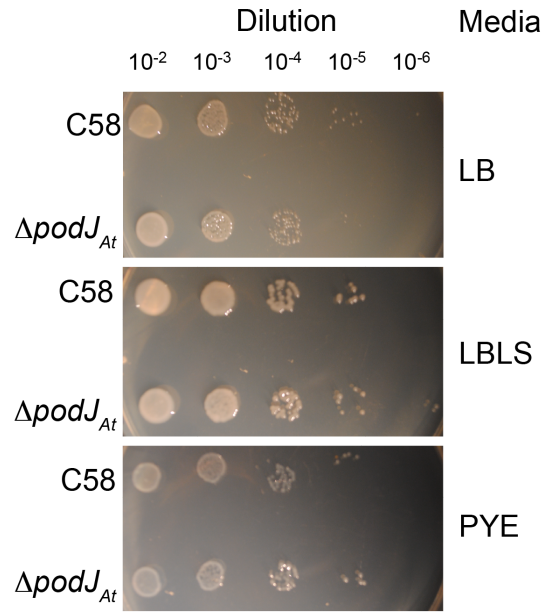

38

39 **Supplementary Figure 7.  $\Delta podJ_{At}$  grows equally as well as WT on LB, LBLS, and PYE solid media.**

40 Growth on LB, LBLS, and PYE plates for the indicated dilutions is compared for the WT and  $\Delta podJ_{At}$  strain.

41

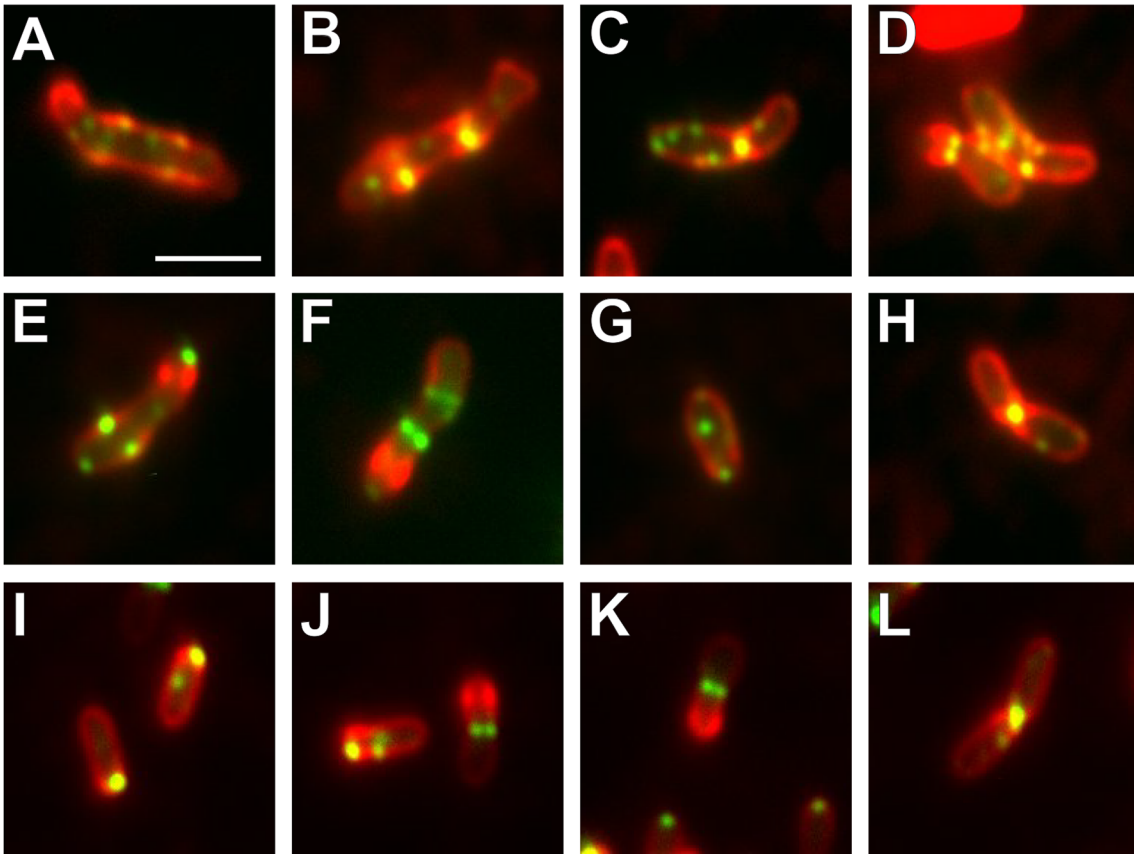

42

43 **Supplementary Figure 8.  $\Delta podJ_{At}$  cells grown in PYE display abnormal FtsZ-GFP localization, whereas**  
 44 **C58 FtsZ-GFP localization is normal.** In  $\Delta podJ_{At}$  cells grown in PYE, FtsZ-GFP localizes in multiple  
 45 peripheral foci (A-E), multiple rings (F), and polar (G) and midcell foci (H). In WT cells grown in PYE, FtsZ-  
 46 GFP localizes to the poles (I), the poles and midcell (J), and at the midcell (K-L). Scale bar indicates 3  $\mu\text{m}$ .

47

#### 48 **SUPPLEMENTARY VIDEO LEGENDS**

49 **Supplementary Video 1. Morphologically normal-looking  $\Delta podJ_{At}$  give rise to cells with**  
 50 **defects in polar growth.** Time lapse video of  $\Delta podJ_{At}$  cells. Circles denote cell division events, white  
 51 dots denote normally-localized growth poles (with respect to the previous division event), red dots  
 52 indicate ectopic growth poles, and red asterisks denote morphologically abnormal cells. At the end



53 of the video numerous morphological alterations have arisen. One second of video corresponds to  
54 20 minutes.

55

56 **Supplementary Video 2. Morphologically normal-looking  $\Delta podJ_{At}$  give rise to cells with**  
57 **defects in polar growth and small, non-growing cells.** Time lapse video of  $\Delta podJ_{At}$  cells. Circles  
58 denote cell division events, white dots denote normally-localized growth poles (with respect to the  
59 previous division event), red dots indicate ectopic growth poles, and red asterisks denote  
60 morphologically abnormal cells. At the end of the video numerous morphological alterations have  
61 arisen. One second of video corresponds to 20 minutes.

62

63 **Supplemental Video 3.  $\Delta podJ_{At}$  cells undergo ectopic polar growth that continues from a**  
64 **growth pole after division.** Selected still images from this time-lapse video are summarized in  
65 Figure 2E. One second of video corresponds to 20 minutes.

66

67 **Supplementary Video 4.  $\Delta podJ_{At}$  cells expressing GFP-PodJ<sub>At</sub> undergo growth and division**  
68 **resembling WT cells, with GFP-PodJ<sub>At</sub> localization similar to WT.** Selected still images from this  
69 time-lapse video are summarized in Figure 4. One second of video corresponds to 20 minutes.

70

71 **Supplementary Video 5.  $\Delta podJ_{At}$  cells expressing PopZ<sub>At</sub>-GFP undergo ectopic polar growth**  
72 **that continues from a growth pole after division.** See PopZ<sub>At</sub>-GFP in top cell. Selected images  
73 from this time-lapse video are summarized in Figure 5A. One second of video corresponds to 20  
74 minutes.

75

76 **Supplementary Video 6. *ΔpodJ<sub>At</sub>* cells expressing PopZ<sub>At</sub>-GFP undergo ectopic polar growth**  
77 **when one growth pole splits into two adjacent growth poles.** Selected images from this time-  
78 lapse video are summarized in Figure 5B. One second of video corresponds to 20 minutes.

79

80 **Supplementary Video 7. *ΔpodJ<sub>At</sub>* cells expressing PopZ<sub>At</sub>-GFP undergo ectopic polar growth**  
81 **when a growth pole extends from a point along the sidewall of the cell.** Selected images from  
82 this time-lapse video are summarized in Figure 5C. One second of video corresponds to 20 minutes.

83

84 **Supplementary Video 8. FtsZ-GFP localize in multiple rings in *ΔpodJ<sub>At</sub>*.** Selected images from  
85 this time-lapse video summarized in Supplementary Figure 6. One second of video corresponds to  
86 20 minutes.

87

88 **Supplementary Video 9. *ΔpodJ<sub>At</sub>* produces cells which do not grow and divide and a fraction**  
89 **of *ΔpodJ<sub>At</sub>* cells are small and anucleate.** Selected images from this time-lapse video summarized  
90 in Figure 8. One second of video corresponds to 20 minutes.

91

92 **Supplementary Table 1.** Strains and plasmids used in this study.

| Strains                  | Relevant genotype                                                                                                                                                    | Source     |
|--------------------------|----------------------------------------------------------------------------------------------------------------------------------------------------------------------|------------|
| <b>XL1 Blue</b>          | <i>E. coli</i> cloning strain, <i>endA1 gyrA96(nal<sup>R</sup>) thi-1 recA1 relA1 lac glnV44 F'[::Tn10 proAB+ lacIq Δ(lacZ)M15] hsdR17(rK-mK+), Tet<sup>R</sup>.</i> | Lab stock  |
| <b>C58</b>               | wild-type <i>A. tumefaciens</i> strain C58                                                                                                                           | Lab stock  |
| <b>A164</b>              | C58, $\Delta podJ_{Atv}$ using pJZ237                                                                                                                                | This work  |
| <b>NT1REB</b>            | Rm <sup>R</sup> Em <sup>R</sup> pTi <sup>-</sup> mot <sup>-</sup> $\Delta flaABC$ (bald strain)                                                                      | (2)        |
| Plasmids                 | Relevant genes and construction information                                                                                                                          | Source     |
| <b>pSRK-Km</b>           | Broad host-range, lac inducible, Kan <sup>R</sup>                                                                                                                    | (3)        |
| <b>pSRK-Gm</b>           | Broad host-range, lac inducible, Gent <sup>R</sup>                                                                                                                   | (3)        |
| <b>pBluescript II SK</b> | Phagemid, Carb <sup>R</sup>                                                                                                                                          | Stratagene |
| <b>pJZ156</b>            | pBSKII+ with <i>sacB</i> , Carb <sup>R</sup>                                                                                                                         | This work  |
| <b>pJZ207</b>            | pSRK-Km with <i>ftsZ-GFP</i> , lac-inducible, Kan <sup>R</sup>                                                                                                       | (1)        |
| <b>pJZ208</b>            | pSRK-Km with <i>ftsA-GFP</i> , lac-inducible, Kan <sup>R</sup>                                                                                                       | (1)        |

---

|               |                                                                                                                                            |           |
|---------------|--------------------------------------------------------------------------------------------------------------------------------------------|-----------|
| <b>pJZ232</b> | pSRK-Gm with <i>gfp-podJ<sub>At</sub></i> , lac-inducible,<br>Gent <sup>R</sup>                                                            | (4)       |
| <b>pJZ237</b> | pJZ156 with 1kb sequences homologous<br>to C58 genomic DNA flanking Atu0499<br>( <i>podJ<sub>At</sub></i> ) and Atu0500, Carb <sup>R</sup> | This work |
| <b>pJZ255</b> | pSRK-Gm with <i>podJ<sub>At</sub></i> , lac-inducible, Gent <sup>R</sup>                                                                   | This work |
| <b>pRG001</b> | pSRK-Gm with <i>popZ<sub>At</sub>-gfp</i> , lac-inducible,<br>Gent <sup>R</sup>                                                            | (4)       |

---

93

94

95 **Supplementary Table 2.** Percentages of WT,  $\Delta podJ_{At}$ , and  $\Delta podJ_{At} + PodJ_{At}$  division events producing  
 96 normal polar growing, ectopic polar growing, and non-growing cells. Numbered schematics representing  
 97 types of division events are shown, with the pre-divisional cell above and resulting sibling cells below. G,  
 98 normal growth poles. E, ectopic growth poles. N, non-growing poles. Filled cells represent non-growing  
 99 cells. These data are derived from time-lapse imaging of individual cells (n).

| Types of division events                                                         | WT<br>(n=148) | $\Delta podJ_{At}$<br>(n=151) | $\Delta podJ_{At} + PodJ_{At}$<br>(n=142) |
|----------------------------------------------------------------------------------|---------------|-------------------------------|-------------------------------------------|
| 1) Producing two normal polar-growing cells                                      | 100%          | 53%                           | 95%                                       |
| 2) Producing one normal polar-growing cell and one<br>ectopic polar-growing cell | 0%            | 37%                           | 3%                                        |
| 3) Producing one normal polar-growing cell and one<br>non-growing cell           | 0%            | 3%                            | 1%                                        |
| 4) Producing one ectopic polar-growing cell and one<br>non-growing cell          | 0%            | 7%                            | 1%                                        |

  

1)

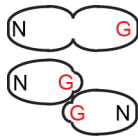

2)



or

3)



4)



100

101

102

103 **Supplementary Table 3.** Median cell lengths of WT and *ΔpodJ<sub>At</sub>* cells displaying the specified FtsA-GFP  
 104 localization. Values for WT are from Zupan *et al.* (12).

|                                  |                         | <b>Unipolar</b> | <b>Unipolar +</b> | <b>Midcell</b> | <b>Aberrant</b> | <b>Aberrant</b> |
|----------------------------------|-------------------------|-----------------|-------------------|----------------|-----------------|-----------------|
|                                  |                         |                 | <b>midcell</b>    |                | <b>polar</b>    | <b>midcell</b>  |
| <b>WT</b>                        | Median cell length (μm) | 1.9             | 2.7               | 3.2            | NA              | NA              |
|                                  | Percentage of cells     | 78              | 13                | 9              | NA              | NA              |
| <b><i>ΔpodJ<sub>At</sub></i></b> | Median cell length (μm) | 2.4             | 3.3               | 3.5            | 2.7             | 4.3             |
|                                  | Percentage of cells     | 36              | 24                | 3              | 22              | 15              |

105

106

107 **Supplementary Table 4. Growth in PYE partially complements the  $\Delta podJ_{At}$  morphology phenotype.**

108 Frequency of  $\Delta podJ_{At}$  and WT cells grown in LB and PYE displaying different morphologies are compared

109 for LB and PYE.

|                               | LB   |                    | PYE  |                    |
|-------------------------------|------|--------------------|------|--------------------|
|                               | WT   | $\Delta podJ_{At}$ | WT   | $\Delta podJ_{At}$ |
| Rod-shaped                    | 96 % | 60 %               | 97 % | 78 %               |
| Multiple<br>constriction/bent | 4 %  | 29 %               | 3 %  | 17 %               |
| Branched/<br>swollen          | 0 %  | 8 %                | 0 %  | 4 %                |
| Minicell                      | 0 %  | 3 %                | 0 %  | 1 %                |
| Number of cells<br>counted    | 283  | 262                | 295  | 340                |

110

111

112 **SUPPLEMENTARY REFERENCES**

- 113 1. **Zupan JR, Cameron TA, Anderson-Furgeson J, Zambryski PC.** 2013. Dynamic FtsA and FtsZ  
114 localization and outer membrane alterations during polar growth and cell division in  
115 *Agrobacterium tumefaciens*. Proc Natl Acad Sci USA **110**:9060–9065.
- 116 2. **Chesnokova O, Coutinho JB, Khan IH, Mikhail MS, Kado CI.** 1997. Characterization of  
117 flagella genes of *Agrobacterium tumefaciens*, and the effect of a bald strain on virulence. Mol  
118 Microbiol **23**:579–590.
- 119 3. **Khan SR, Gaines J, Roop RM, Farrand SK.** 2008. Broad-host-range expression vectors with  
120 tightly regulated promoters and their use to examine the influence of TraR and TraM  
121 expression on Ti plasmid quorum sensing. Appl Environ Microbiol **74**:5053–5062.
- 122 4. **Grangeon R, Zupan JR, Anderson-Furgeson J, Zambryski PC.** 2015. PopZ identifies the new  
123 pole, and PodJ identifies the old pole during polar growth in *Agrobacterium tumefaciens*. Proc  
124 Natl Acad Sci USA **112**:11666–11671.

125
